# Supplementary material
Source: MDPI journal article supplement (https://www.mdpi.com/1424-2818/15/9/994)
Supplement: s1 [file s1]

**Table S1** - Uncorrected p-distances for all sequenced gene regions.

|                     | <i>E. syriaca</i>                                   | <i>E. zoufali</i>                                | <i>E. ? quadr.</i>                             | <i>E. aenea</i>                                  | <i>E. rioloides</i>                             | <i>E. bosnica</i>                            |
|---------------------|-----------------------------------------------------|--------------------------------------------------|------------------------------------------------|--------------------------------------------------|-------------------------------------------------|----------------------------------------------|
| <i>E. syriaca</i>   | (a) 0,0058<br>(b) 0,0015<br>(c) 0,0005<br>(d) 0,001 |                                                  |                                                |                                                  |                                                 |                                              |
| <i>E. zoufali</i>   | (a) 0,038<br>(b) 0,008<br>(c) 0,011<br>(d) 0,015    | (a) 0,0023<br>(b) 0,00<br>(c) 0,00<br>(d) 0,006  |                                                |                                                  |                                                 |                                              |
| <i>E. ? quadr.</i>  | (a) 0,046<br>(b) 0,045<br>(c) n.a.<br>(d) n.a.      | (a) 0,044<br>(b) 0,037<br>(c) n.a.<br>(d) n.a.   | (a) 0,0032<br>(b) n.a.<br>(c) n.a.<br>(d) n.a. |                                                  |                                                 |                                              |
| <i>E. aenea</i>     | (a) 0,126<br>(b) 0,17<br>(c) 0,05<br>(d) 0,052      | (a) 0,127<br>(b) 0,165<br>(c) 0,043<br>(d) 0,058 | (a) 0,126<br>(b) 0,167<br>(c) n.a.<br>(d) n.a. | (a) n.a.<br>(b) n.a.<br>(c) n.a.<br>(d) n.a.     |                                                 |                                              |
| <i>E. rioloides</i> | (a) 0,117<br>(b) 0,184<br>(c) 0,044<br>(d) 0,04     | (a) 0,116<br>(b) 0,183<br>(c) 0,037<br>(d) 0,054 | (a) 0,112<br>(b) 0,184<br>(c) n.a.<br>(d) n.a. | (a) 0,038<br>(b) 0,044<br>(c) 0,048<br>(d) 0,012 | (a) n.a.<br>(b) n.a.<br>(c) n.a.<br>(d) n.a.    |                                              |
| <i>E. bosnica</i>   | (a) 0,114<br>(b) 0,171<br>(c) 0,044<br>(d) n.a.     | (a) 0,111<br>(b) 0,167<br>(c) 0,037<br>(d) n.a.  | (a) 0,112<br>(b) 0,165<br>(c) n.a.<br>(d) n.a. | (a) 0,069<br>(b) 0,048<br>(c) 0,035<br>(d) n.a.  | (a) 0,054<br>(b) 0,066<br>(c) 0,046<br>(d) n.a. | (a) n.a.<br>(b) n.a.<br>(c) n.a.<br>(d) n.a. |

For each species-pair, p-distances are noted consecutively for COI (a), ITS1 (b), CAD (c) and H3 (d).

Within-species p-distances are in bold font; n.a. stands for "not applicable".
